# Supplementary material for: Exciton-dominant photoluminescence of MoS2 by a functionalized substrate
Source: Royal Society of Chemistry journal article supplement (doi:10.1039/d2nr03455g), 2022-01-01
Supplement: d2nr03455g1.pdf [file d2nr03455g1.pdf]

## Supplementary Materials

# Exciton-dominant Photoluminescence of MoS<sub>2</sub> by Functionalized Substrate

*Eunji Ji,<sup>1, ‡</sup> Kyungmin Yang,<sup>2, ‡</sup> June-Chul Shin,<sup>2</sup> Youngbum Kim,<sup>3</sup> Jin-Woo Park,<sup>1</sup> Jeongyong Kim,<sup>3</sup> Gwan-Hyoung Lee<sup>2,4,5,6\*</sup>*

<sup>1</sup> Department of Material Science and Engineering, Yonsei University, Seoul, 03722, Korea

<sup>2</sup> Department of Materials Science and Engineering, Seoul National University, Seoul 08826, Korea

<sup>3</sup> Department of Energy Science, Sungkyunkwan University, Suwon 16419, Republic of Korea

<sup>4</sup> Research Institute of Advanced Materials (RIAM), Seoul National University, Seoul 08826, Korea

<sup>5</sup> Institute of Engineering Research, Seoul National University, Seoul 08826, Korea

<sup>6</sup> Institute of Applied Physics, Seoul National University, Seoul 08826, Korea

<sup>‡</sup> These authors contributed equally

\*Gwan-Hyoung Lee: gwanlee@snu.ac.kr

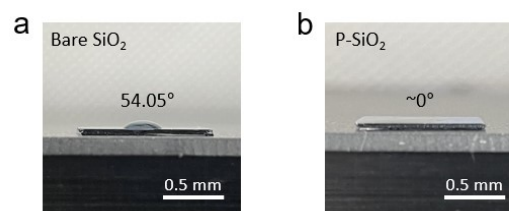

**Fig. S1** The water contact angle on different treated SiO<sub>2</sub> substrate. **(a)** the water contact angle on the bare SiO<sub>2</sub> without any treatment was 54.05°. **(b)** the water contact angle on the plasma-treated SiO<sub>2</sub> with plasma treatment for 1 min was about 0°.

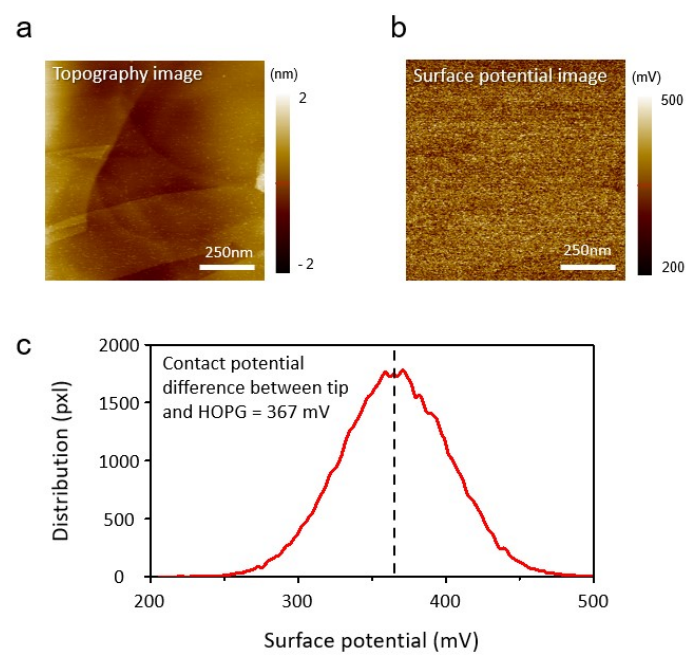

**Fig. S2** The topography image of HOPG and (b) corresponding surface potential image (c) The surface potential distribution graph of figure S2 (b)

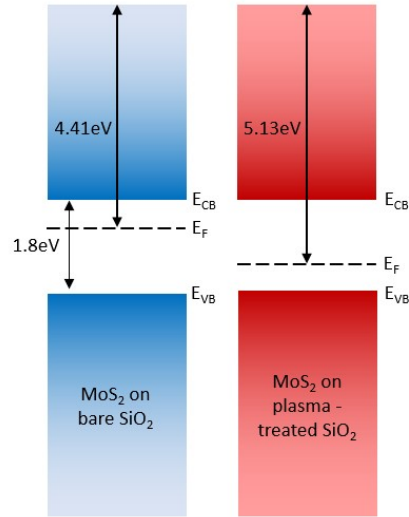

$$\text{Potential between sample and tip} = (\phi_{\text{tip}} - \phi_{\text{sample}})/e$$

$$\text{Potential between MoS}_2 \text{ and tip} = (\phi_{\text{tip}} - \phi_{\text{MoS}_2})/e$$

$$\phi_{\text{MoS}_2} = \phi_{\text{tip}} - e(\text{Potential between MoS}_2 \text{ and tip})$$

$$\phi_{\text{HOPG}} = \phi_{\text{tip}} - e(\text{Potential between HOPG and tip})$$

$$\phi_{\text{MoS}_2} = \phi_{\text{HOPG}} + e(\text{Potential between HOPG and tip}) - e(\text{Potential between MoS}_2 \text{ and tip})$$

$$\phi_{\text{HOPG}} = 4.65 \text{ eV (well known)}$$

$$\text{Potential between HOPG and tip} = 0.367 \text{ V}$$

$$\phi_{\text{MoS}_2 \text{ on bare SiO}_2} = 4.65 \text{ eV} + 0.367 \text{ eV} - 0.607 \text{ eV} = 4.41 \text{ eV}$$

$$\phi_{\text{MoS}_2 \text{ on plasma-treated SiO}_2} = 4.65 \text{ eV} + 0.367 \text{ eV} + 0.116 \text{ eV} = 5.13 \text{ eV}$$

**Fig. S3** Band diagrams with work function value of MoS<sub>2</sub> on both substrates

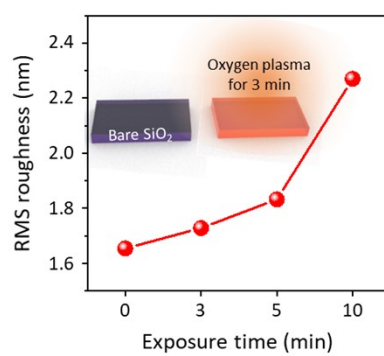

**Fig. S4** RMS roughness of SiO<sub>2</sub> surface according to each oxygen plasma exposure time for 0 (bare SiO<sub>2</sub>), 3, 5 and 10 min, respectively

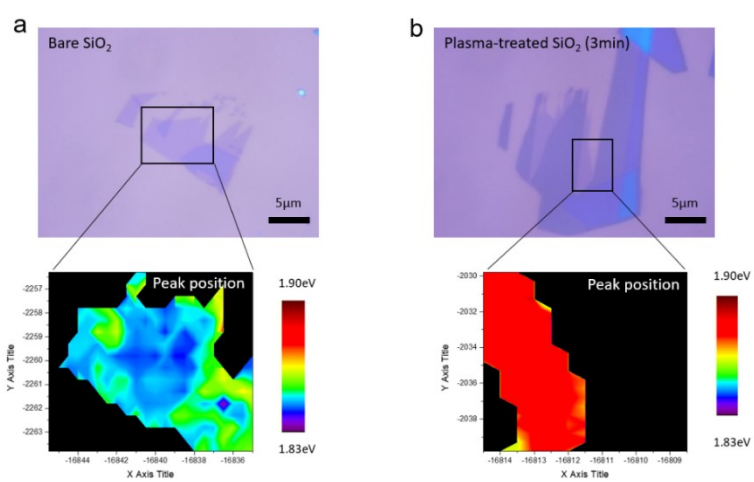

**Fig. S5** PL peak position mapping images of (a) 1L MoS<sub>2</sub>/bare SiO<sub>2</sub> and (b) 1L MoS<sub>2</sub>/Plasma-treated SiO<sub>2</sub> (3 min)

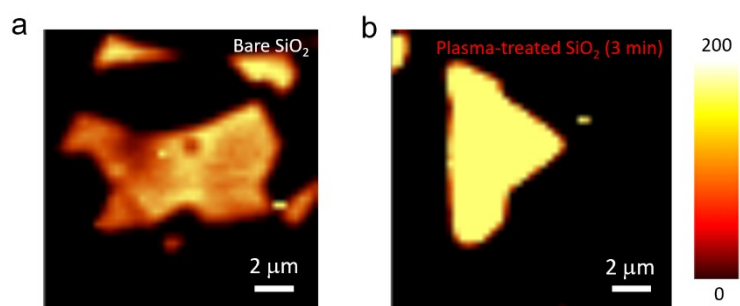

**Fig. S6** PL intensity mapping images of (a) 1L MoS<sub>2</sub>/bare SiO<sub>2</sub> and (b) 1L MoS<sub>2</sub>/Plasma-treated SiO<sub>2</sub> (3 min)

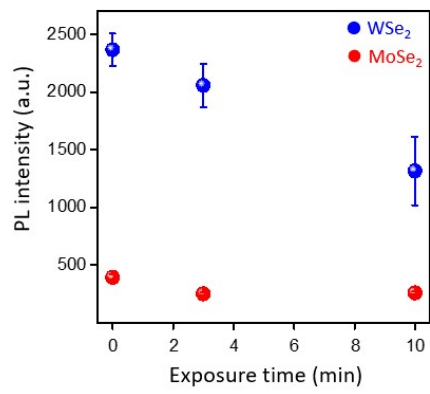

**Fig. S7** Integrated PL intensity spectra of WSe<sub>2</sub> (Blue circled dots) and MoSe<sub>2</sub> (Red circled dots) as a function of oxygen plasma exposure time for different times from 1 to 10 min.



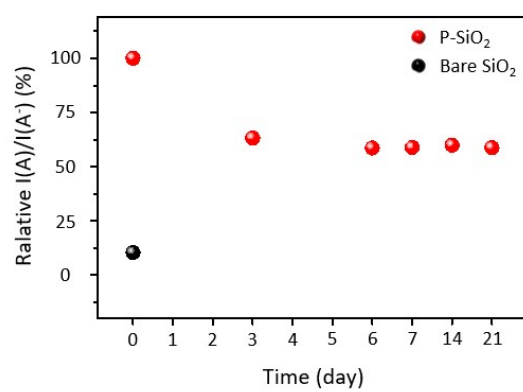

**Fig. S8** Rate of reduction of relative PL intensity ratios between A and A<sup>-</sup> ( $I_A/I_{A^-}$ ) peaks of MoS<sub>2</sub>/bare SiO<sub>2</sub> (Black dot) and MoS<sub>2</sub>/Plasma-treated SiO<sub>2</sub> (Red dots) as a function of stability time to 21 days in the air

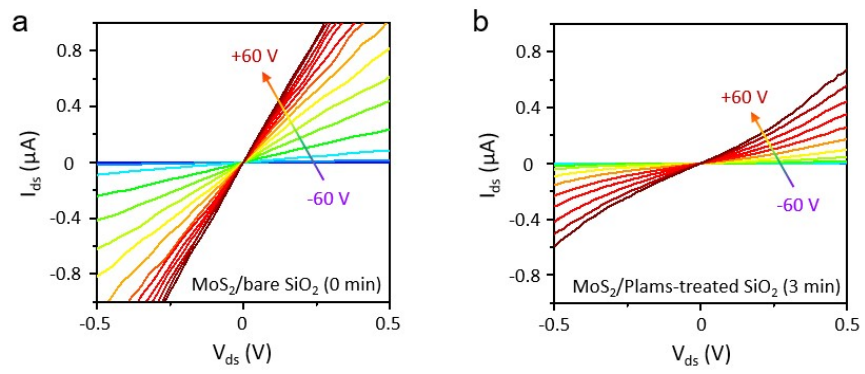

**Fig. S9 (a)** Output curve of MoS<sub>2</sub>/Bare SiO<sub>2</sub> **(b)** Output curve of MoS<sub>2</sub>/Plasma-treated SiO<sub>2</sub>
